# Supplementary material for: Marine-Derived Compounds as Potential Inhibitors of Hsp90 for Anticancer and Antimicrobial Drug Development: A Comprehensive In Silico Study
Source: MDPI journal article supplement (doi:10.3390/molecules28248074), 2023-12-13
Supplement: s1 [file s1]

# Marine-Derived Compounds as Potential Inhibitors of Hsp90 for Anticancer and Antimicrobial Drug Development: A Comprehensive In Silico Study

**Mebarka Ouassaf, Lotfi Bourougaa, Samiah Hamad Al-Mijalli, Emad M. Abdallah, Ajmal R. Bhat, Sarkar M. A. Kawsar**

**Table S1.** Properties and Definitions of Selected Marine-Derived Compounds as Potent Inhibitors of Hsp90 Protein.

| CMNPD             | 22591                                                                             | 9335                                                                              | 10015                                                                              | 360799                                                                              | 15115                                                                                            | 20988                                                                               |
|-------------------|-----------------------------------------------------------------------------------|-----------------------------------------------------------------------------------|------------------------------------------------------------------------------------|-------------------------------------------------------------------------------------|--------------------------------------------------------------------------------------------------|-------------------------------------------------------------------------------------|
| Structure         | 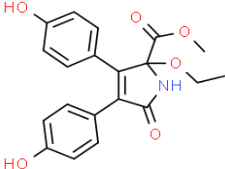 |  |  |  |               |  |
| Canonical SMILES  | <chem>c1cc(ccc1O)C2=C([C@](OC(C)(NC2=O)C(OC)=O)c3ccc(O)cc3</chem>                 | <chem>C1(=O)NC(=O)C(c2c[nH]c1ccc23)c23=C1c4[nH]cnc4</chem>                        | <chem>C1=CC=C2C(=C1)C(=CN2)C(=O)C3=N(C(=C(N3)C=C4C=NC5=CC=CC=C54)O</chem>          | <chem>c12c(ccc1)[nH]cc2[C@@H]3CNC(=O)C(c4c[nH]c(c4ccc5)c5)=N3</chem>                | <chem>CN(CCC1=CNC2=C1C(=O)C3=C(C2=O)NC=C3C4=CC=C(C(=C4)O)C=O</chem>                              | <chem>COC1=C2C(=C(C=C1C3=CC=C(C=C3)O)O)C4=CC(=C(C(=C4O2)O)O</chem>                  |
| PubChem CID       | 162904707                                                                         | 398493                                                                            | 136691197                                                                          | 16104844                                                                            | 11717517                                                                                         | 53262759                                                                            |
| Molecular formula | C <sub>20</sub> H <sub>15</sub> NO <sub>6</sub>                                   | C <sub>15</sub> H <sub>10</sub> N <sub>4</sub> O <sub>2</sub>                     | C <sub>21</sub> H <sub>14</sub> N <sub>4</sub> O <sub>2</sub>                      | C <sub>20</sub> H <sub>16</sub> N <sub>4</sub> O                                    | C <sub>20</sub> H <sub>17</sub> N <sub>3</sub> O <sub>4</sub>                                    | C <sub>19</sub> H <sub>14</sub> O <sub>6</sub>                                      |
| IUPAC name        | methyl (2R)-2-ethoxy-3,4-bis(4-hydroxyphenyl)-5-oxo-1H-pyrrole-2-carboxylate      | 3-(1H-imidazol-5-yl)-4-(1H-indol-3-yl)pyrrole-2,5-dione                           | [4-hydroxy-5-(indol-3-ylidenemethyl)-1H-imidazol-2-yl]-(1H-indol-3-yl)methanone    | ((3R)-3,5-bis(1H-indol-3-yl)-2,3-dihydro-1H-pyrazin-6-one                           | N-[2-[3-(4-hydroxyphenyl)-4,8-dioxo-1,7-dihydropyrrolo[3,2-f]indol-5-yl]ethyl]-N-methylformamide | 3-(4-hydroxyphenyl)-4-methoxydibenzofuran-1,7,8-triol                               |
| Synonym           | Lanthellidone B                                                                   | Didemnimide A                                                                     | Rhopaladins D                                                                      | (R)-6'-debromohamacanthin B                                                         | Zyzzyanone D                                                                                     | 3''-deoxy-6'-O-desmethylcandidusin B                                                |
| Resource          | Demospongiae                                                                      | Didemnum granulatum                                                               | tunicate Rhopalaea sp                                                              | Spongisorites                                                                       | Zyzzya fuliginosa                                                                                | Penicillium chermesinum                                                             |

|                             |           |         |         |         |                |                   |
|-----------------------------|-----------|---------|---------|---------|----------------|-------------------|
| <b>Classy fire subclass</b> | Stilbenes | Indoles | Indoles | Indoles | Pyrroloindoles | Phenylbenzofurans |
|-----------------------------|-----------|---------|---------|---------|----------------|-------------------|

Table S2. Result Of Enrichment Study.

| Pharmacophore model | AUC  | RIE  | ROC  | BedROC160.9 | Total active | Number of ranked actives |
|---------------------|------|------|------|-------------|--------------|--------------------------|
| DDRRR               | 0.84 | 7.18 | 0.78 | 0.58        | 35           | 29                       |

Table S3. Organ and End Points Toxicity for Top Leads Compound.

|                     |                 |         | 22591       |            | 9335        |            | 10015       |            | 360799      |            | 15115       |            | 20988       |            | MEY         |            |
|---------------------|-----------------|---------|-------------|------------|-------------|------------|-------------|------------|-------------|------------|-------------|------------|-------------|------------|-------------|------------|
|                     |                 |         | Probability | Prediction |
| Organ toxicity      | Hepatotoxicity  | dili    | 0.50        | inactive   | 0.51        | inactive   | 0.50        | inactive   | 0.72        | inactive   | 0.62        | inactive   | 0.67        | inactive   | 0.55        | active     |
|                     | Carcinogenicity | carcino | 0.58        | inactive   | 0.51        | active     | 0.55        | active     | 0.56        | inactive   | 0.59        | active     | 0.62        | active     | 0.71        | inactive   |
| Toxicity end points | Immunotoxicity  | immuno  | 0.95        | inactive   | 0.73        | inactive   | 0.7         | inactive   | 0.98        | inactive   | 0.79        | inactive   | 0.8         | inactive   | 0.54        | inactive   |
|                     | Mutagenicity    | mutagen | 0.67        | inactive   | 0.61        | inactive   | 0.6         | active     | 0.67        | inactive   | 0.54        | inactive   | 0.55        | inactive   | 0.78        | inactive   |
|                     | Cytotoxicity    | cyto    | 0.66        | inactive   | 0.7         | inactive   | 0.74        | inactive   | 0.77        | inactive   | 0.55        | inactive   | 0.95        | inactive   | 0.64        | inactive   |

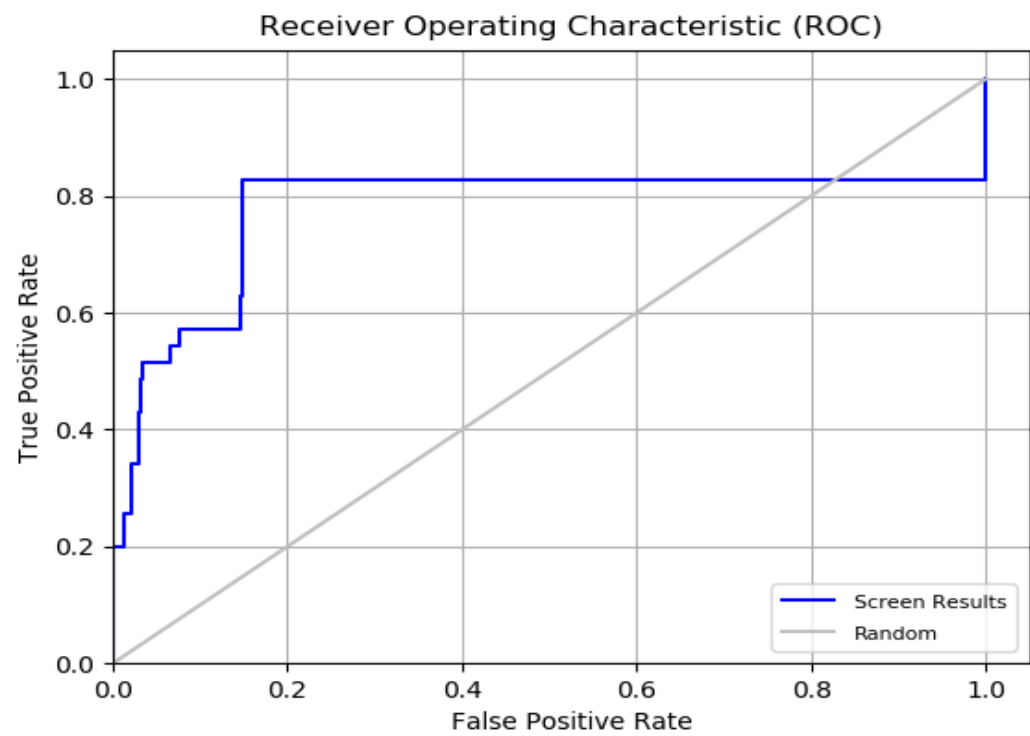

**Figure S1.** ROC plot of the pharmacophore model.

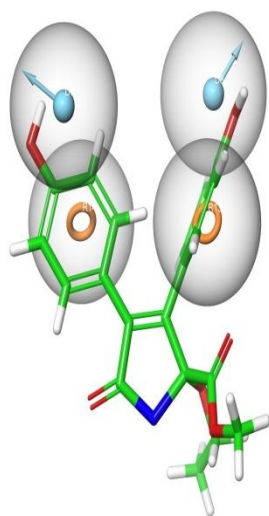

22591

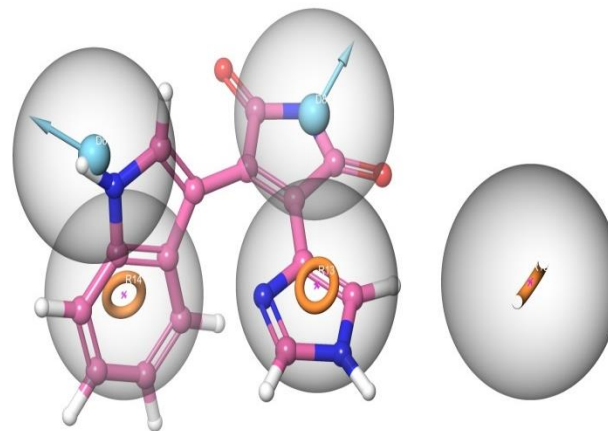

9335

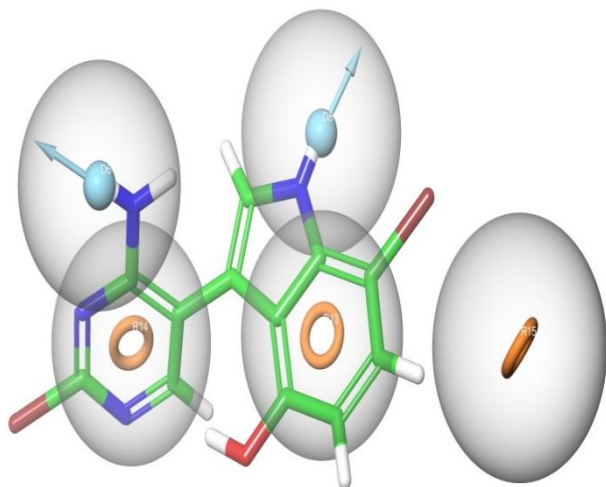

15115

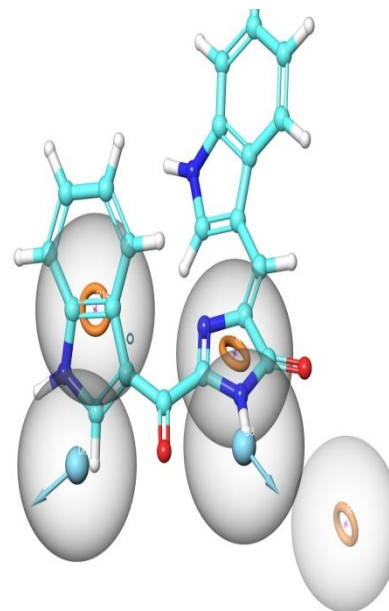

10015

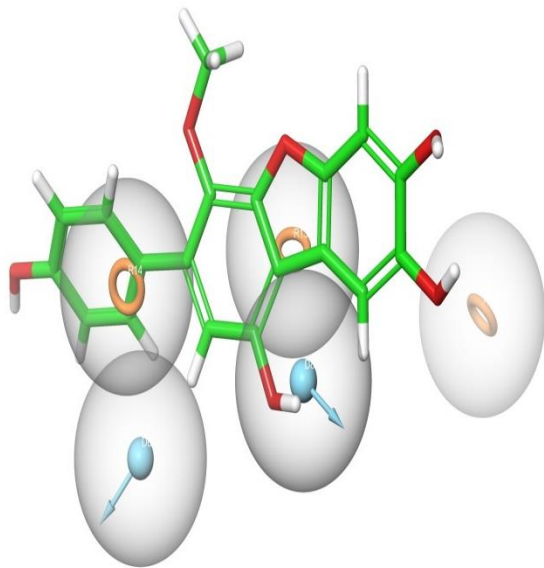

20988

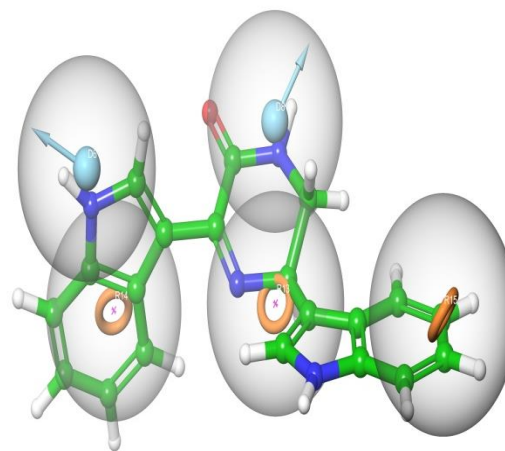

360799

**Figure S2.** The model map onto top leads.
